# Discovery of the spatial pattern of prickles on the stem of the rose and the mathematical model of the pattern.

Kazuaki Amikura<sup>1,2\*</sup> and Hiroshi Ito<sup>3</sup>

<sup>1</sup>Department of Molecular Biophysics and Biochemistry, Yale University, New Haven, Connecticut, USA

<sup>2</sup>Department of Computational Biology and Medical Sciences, Graduate School of Frontier Sciences, The University of Tokyo, Japan

<sup>3</sup>Department of Art and Information Design, Faculty of Design, Kyushu University, Japan

\*Corresponding Author: kazuaki.amikura@yale.edu

1 **Reproducible pattern is a key characteristic of organisms. Many**  
 2 **developmental patterns are known that it is orchestrated by dif-**  
 3 **fusion of the factors. Herein, we reported a novel patterning**  
 4 **that seems to be controlled by diffusion factors. Although it**  
 5 **looks like the prickles randomly emerge on the stem of rose, we**  
 6 **deciphered patterns for the position of prickles with statistical**  
 7 **data and proposed a mathematical model to explain the process**  
 8 **via which the pattern emerged. By changing the model param-**  
 9 **eters, we reproduce another pattern on other plant species. This**  
 10 **finding indicates that the patterns between many species are or-**  
 11 **ganized by similar systems. Moreover, although the pattern of**  
 12 **organisms is often linked to its function, we consider the spatial**  
 13 **pattern of prickles may have a function to play the role of prick-**  
 14 **les effectively. Further studies will clarify the role of prickles**  
 15 **and reveal the entity of diffusive factors.**

16 **Plant development | Rose | Prickle | Mathematical model**

17 **Correspondence: kazuaki.amikura@yale.edu**

18 The pattern formation is fundamental characteristic of  
 19 life. Many pattern formations are expected that it is orches-  
 20 trated by diffusion of the factors. Gradient of diffused fac-  
 21 tors are considered key factor of development in early 20th  
 22 century(1, 2). In 1952, Alan M. Turing provide conceptual  
 23 formulated solution to explain the pattern formation based  
 24 on the diffusion(3). For half a century from then, it has been  
 25 shown that his model applies to many phenomena of the de-  
 26 velopment of life(4, 5).

27 In the pattern formation of plant, the diffusion of auxin  
 28 that is a plant hormone plays a central role(6). Especially, the  
 29 development mechanism of the phyllotaxis pattern that is the  
 30 positioning of leaves on the stem has well understood based  
 31 on the diffuse of auxin. It is proposed that the phyllotaxis  
 32 of *Arabidopsis* is dependent on polar auxin transport.(7, 8).  
 33 The pattern of leaf venation is also explained by polar auxin  
 34 transport in leaves(9). Otherwise, the position of stomatal  
 35 and trichome are considered to be organized by diffusing fac-  
 36 tors such as protein and peptide(10). As these results show,  
 37 the diffusion of the factors is fundamental phenomena for the  
 38 pattern forming of plant.

39 This paper focuses on the pattern of prickles on the stem of  
 40 rose. Although research about the flower reported from vari-  
 41 ous viewpoints, but the prickle on the stem and the petiole is  
 42 not well studied. Anatomical studied showed that the gland-  
 43 ular trichome developed from an epidermal tissue seems to  
 44 be grown into prickle in rose(11). Recently, the candidate  
 45 gene that controls the density of prickle on the stem has been  
 46 suggested(12), while the gene concerning the emergence of  
 47 prickle is not revealed yet (13, 14). Therefore, the molecular

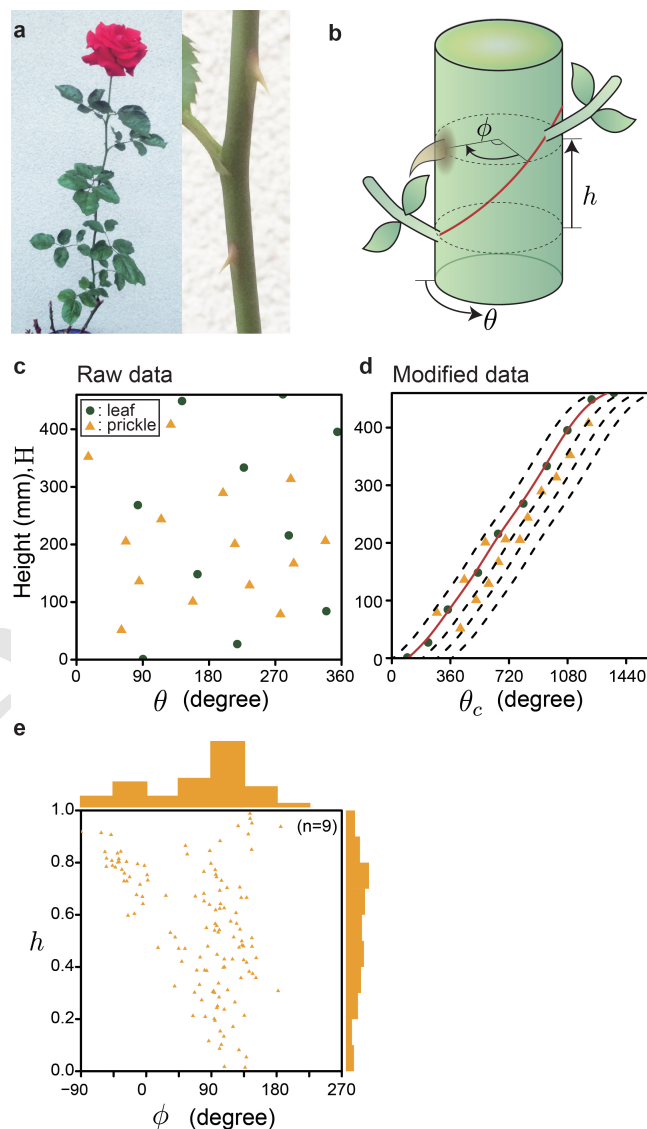

**Fig. 1.** Pattern of prickles. a, Complete view and prickle of *Rosa hybrida* cv. 'Red Queen'. b,  $\theta$  is the measured angle of leaf or prickle.  $\phi$  is the degree between prickle and the spline curve at same height on the stem. Let  $h$  define as the height of prickle between adjacent leaves, where the length between two leaves is 1. c, The position of leaves and prickles on the stem. Green circle is leaf. Yellow triangle is prickle. d, Deep red line show the spline curve connecting leaves. The dotted line was drawn by adding  $-90^\circ$ ,  $90^\circ$ ,  $180^\circ$ , or  $270^\circ$  to the spline curve. e, Scatter plot of  $\phi$  and  $h$  profile from measured samples ( $n=9$ ). The histogram represents the distribution of  $\phi$  or  $h$  from measured samples.

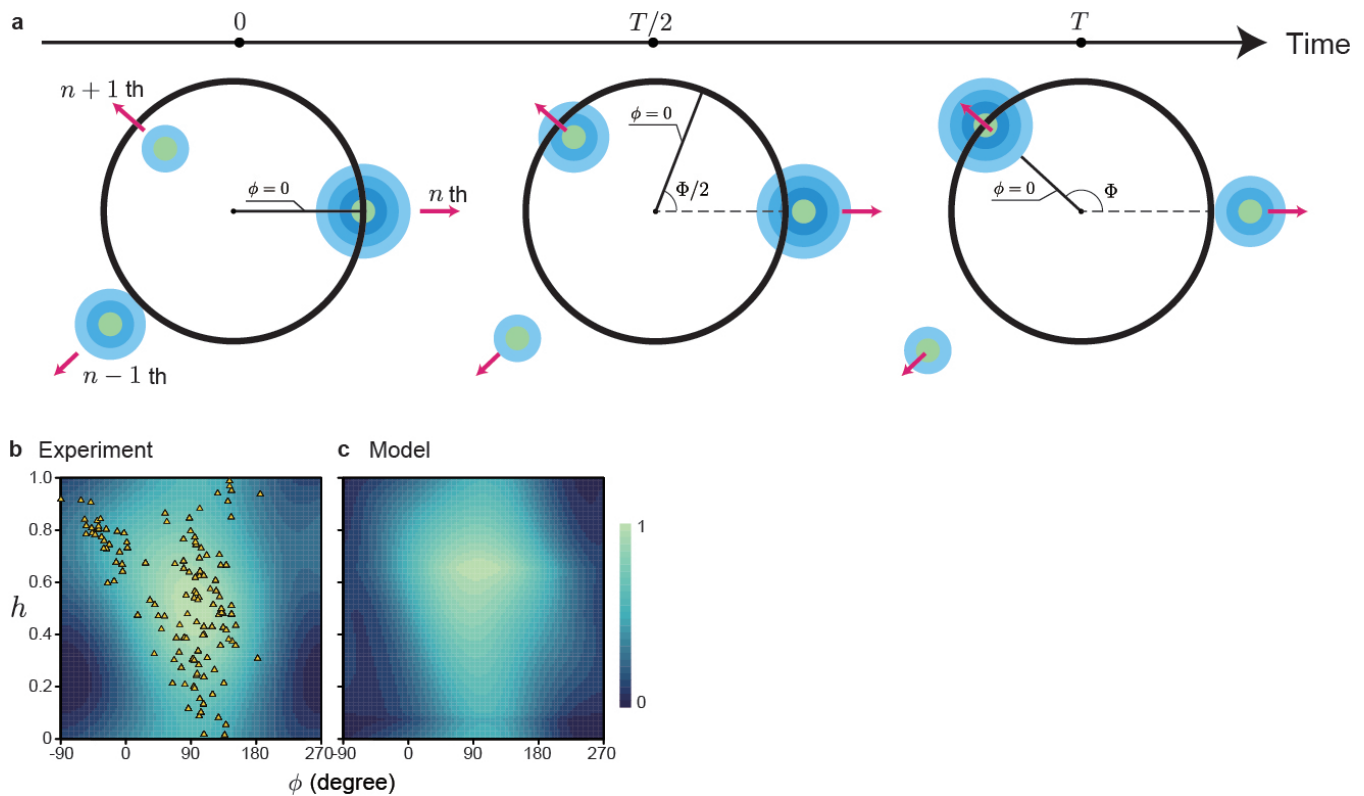

**Fig. 2.** A model for development of prickles. a, Schematic diagram for distribution of inhibitor for development of prickles produced by primordia. Primordia are periodically created with a angle of  $\Phi$  on a meristem. We assumed each primordia produces a inhibitor for creation of prickles and moves to outside at a constant velocity as growing. The prickles can be produced at a distance from the top of meristem (black circle) and the probability of synthesis of prickles on the circle is proportional to reciprocal of concentration of the inhibitor. The position on the circle can be specified by  $\phi$ , the angle from the spline curve. Black line from the center to the edge show the point of  $\phi = 0$  at each time. The amount of secretion of the inhibitor follows  $k(T)$ . b, Estimated density of prickles on the  $\phi$ - $h$  plane through kernel density estimation for real data (Fig. 1e). c, Computer simulated density of prickles with a set of optimized parameters at  $\alpha = 0.267$ ,  $\beta = 0.139$ ,  $T_a = -0.909$ ,  $T_b = 0.980$  and  $T_c = 1.590$ .

mechanism of the development of prickle is not understood as well as other protrusion structures on the stem, such as thorn and spine. Moreover, the pattern of prickles on the stem of rose is not studied with statistical data and mathematical model in the long history of rose.

In this paper, we decipher the pattern of prickles on the stem of rose has the pattern and suggests the mathematical model based on the diffusion. We think this is the first report about the position of prickle with statistical data and mathematical model in the history of rose. Those data will help to understand the molecular mechanism of the development of prickle and to clear the role of prickles.

## Results

**Spatial pattern of prickles.** *Rosa hybrida* cv. 'Red Queen' that has many prickles on the stem is used for the experiments (Fig. 1a). We measured the height and the angle of prickles during blooming the rose. We defined the measured height from the root of the shoot to leaf or prickle,  $H$ , and the measured angle of leaf or prickle with a stem as the axis,  $\theta$  (Fig. 1b). The angle of leaves of *Rosa hybrida* cv. 'Red Queen' showed spiral pattern based on the golden angle  $\Phi$  (Supplementary Fig. 1).  $\theta$  was modified to  $\theta_c$  that is cumulative value of  $\theta$ , where  $\theta_c = \theta + 360N$  and  $N$  is non-negative integers, in order to express the relation of degree and height as a function (deep red line in Fig. 1c and Supplementary

Fig. 2). From the low position leaf to the high position leaf,  $N$  of each leaf was selected so that  $\theta_c$  of leaf increase monotonically. The spline curve connecting the leaf position  $\theta_c$  is drawn on the  $\theta_c - H$  plane (Fig. 1D (deep red line)). The spline curve is expressed as a function of height,  $h$ ,  $\hat{\theta}_{sp}(h)$ . We defined the angle from the spline curve as  $\phi$  (Fig. 1d).

$$\phi_i = \theta_{ci} - \hat{\theta}_{sp}(h_i^p),$$

where  $i$  is the index of prickle, is assigned in order from bottom to top.  $N$  of prickle was selected so that  $\phi$  of prickle ranged from  $-90^\circ$  to  $270^\circ$ .

We discovered that the prickle occurs frequently in the range of  $\phi$  between  $90^\circ$  and  $135^\circ$  at any  $h$  (Fig. 1E). If  $\phi$  is between  $-90^\circ$  and  $0^\circ$ , prickles were emerged at over  $h > 0.6$ . On the other hand, there are almost no prickles in other areas. Those results strongly demonstrate the position of prickle has a pattern.

**Mathematical model of the patterning.** The fact that prickles emerge with a specific angle to leaves implies there are some regulations by primordia in the development of prickles. We constructed a simple model that reproduces the pattern of prickles on plane surface centered on apical meristem. The model assumed that periodically-generated primordia regulate the development of prickles through producing the inhibitor. Primordia moves straight away from

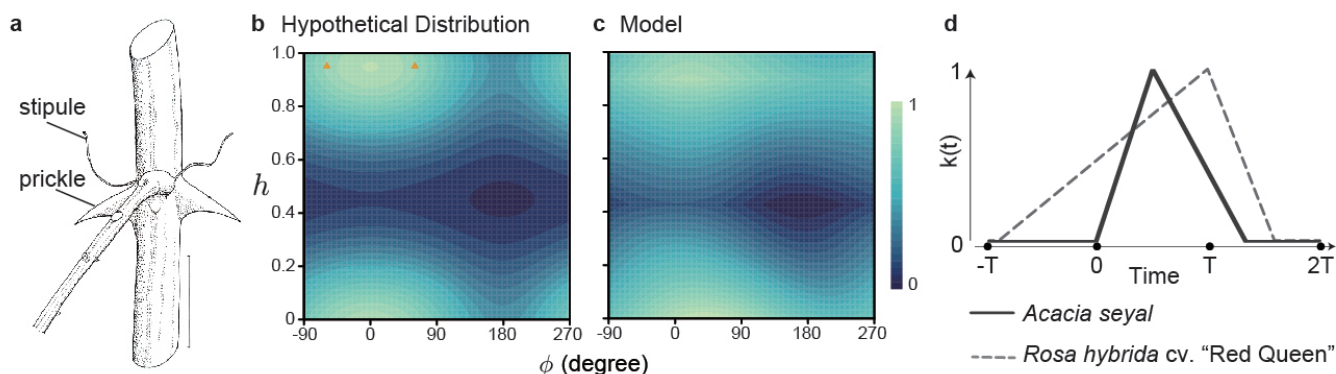

**Fig. 3.** Estimation of the other pattern. a, Drawing of *Acacia seyal* which is modified from the Adrian's book at page 146 and 147(15). b, The  $h$ - $\phi$  plane drawn by estimated prickle pattern of *Acacia seyal*. The  $h$  is 0.95. The  $\phi$  of the two prickles is 60 and -60. c, Computer simulated density of prickles with a set of optimized parameters at  $\alpha = 0.227$ ,  $\beta = -0.144$ ,  $T_a = -0.023$ ,  $T_b = 0.489$  and  $T_c = 1.330$ . d, Plot of the time dependent production rate  $k(t)$ .

96 the top of meristem. The direction of migration of primordia 137  
 97 is shifted by  $\Phi$  from the direction of the last produced pri- 138  
 98 mordia. The priming circle where the location of prickles is 139  
 99 determined locates at a distance from the top of apical meris- 140  
 100 tem. We also assumed the diffusion rate enough rapid that 141  
 101 the inhibitor rapidly get equilibrium. Thus, distribution of 142  
 102 inhibitor on the meristem is two-dimensional Gaussian dis- 143  
 103 tribution, implying that the concentration of inhibitor on the 144  
 104 priming circle can be described as von Mises distribution, 145  
 105  $k \exp(m \cos \phi)$ , where  $m$  is a concentration parameter and  $k$  146  
 106 is a time-dependent parameter. These parameters,  $m$  and  $k$ , 147  
 107 depend on time in our model.  $m$  should be proportional of 148  
 108 the distance between the source of inhibitor and the center of 149  
 109 the priming circle. Thus, we described the time dependence 150  
 110 of  $m$  as  $m(t) = \max[\alpha t + \beta, 0]$ , where  $\alpha > 0$ , suggesting 151  
 111 that primordia moves at a constant velocity. In addition, we 152  
 112 hypothesized the production rate of inhibitor as a function of 153  
 113 time,  $k(t)$  that maximize after when the primordia had passed 154  
 114 through the priming circle. We assumed  $k(t)$  is a piecewise 155  
 115 linear function that has three parameters  $T_a$ ,  $T_b$ , and  $T_c$  (see 156  
 116 Model in Methods). It imply that the position of prickles 157  
 117 locating between  $n$ -th and  $n + 1$ -th primordia can be deter- 158  
 118 mined by the distribution of inhibitor produced by  $n + 1$ th, 159  
 119  $n$ th and  $n - 1$ th primordia (Fig. 2a).

120 The parameter in the model,  $\alpha$ ,  $\beta$ ,  $T_a$ ,  $T_b$ , and  $T_c$  were op- 160  
 121 timized to maximize the correlation between the actual pat- 161  
 122 tern of prickles,  $p(\phi, h)$  and reciprocal of the amount of in- 162  
 123 hibitor,  $f(\phi, t)^{-1}$ .  $p(\phi, h)$  was estimated from the real data 163  
 124 (Fig. 2b and Methods). The optimized model qualitatively re- 164  
 125 produced the actual distribution of prickles that peaks around 165  
 126  $90^\circ$ . Note that we repeated the optimization procedure with 166  
 127  $10^4$  initial parameter sets. The parameters converged to either 167  
 128 of two distinct parameter sets through the optimization. Fig. 168  
 129 2c was drawn based on the set of parameters that produces the 169  
 130 distribution of  $f$  with the highest correlation to real data. The 170  
 131 other set of parameters also produces the similar distribution 171  
 132 of  $f$  although  $k(t)$  obtained from the parameters is shifted 172  
 133 by approximately  $0.2T$  (Supplementary Fig. 3). Additionally, 173  
 134 We evaluate the dependency of the parameters relating 174  
 135 to the diffusion of the inhibitor on maintaining the prickle 175  
 136 patterning (Supplementary Fig. 4a). As a result, it was found 176

that the distribution of the inhibitor being concave downward 137  
 is crucial for reproducing the pattern of 'Red Queen' (Sup- 138  
 plementary Fig. 4b, lower graphs). On the other hand, the 139  
 pattern is relatively robust for quantitatively altering the dis- 140  
 tribution of the inhibitor itself (Supplementary Fig. 4b, upper 141  
 graphs).

**Reproduce the another pattern on the other plant species.** We tested that our model is able to reproduce the 142  
 pattern of prickles in other plant species. Many plants show 143  
 a pair of prickles under the root of leaf, not stipule (Fig. 3a). 144  
 For example, *Rosa hirtula* (Regel) Nakai and *Acacia seyal* 145  
 has a pair of the prickles at the same height (15) (Fig. 3a). We 146  
 found the parameter set showing pair pattern on  $\phi$ - $h$  plane 147  
 through the optimization algorithm (Fig. 3b, 3c). The re- 148  
 leasing time of the inhibitor in *Acacia seyal* is different from 149  
 'Red Queen' (Fig. 3d). This result indicates differences in 150  
 the parameter sets of the diffusion can cause the diversity of 151  
 the prickle patterning in the kingdom Plantae (Supplementary 152  
 Fig. 5).

**Interaction between prickles.** Here, We have focused on 153  
 the interactions between primordia and prickles so far, but in- 154  
 teraction between prickles was indicated from the length  $d_{pp}$  155  
 between a prickle and the nearest one. The  $d_{pp}$  of the 'Red 156  
 Queen' showed the growing prickle strongly inhibit the de- 157  
 velopment of other prickles within about 5 mm radius (Sup- 158  
 plementary Fig. 6a). It indicates growing prickles prevent 159  
 the growth of other prickles surrounds growing one, like ex- 160  
 cluded volume effects. If there is no excluded volume effects 161  
 and the position is determined randomly, fused prickle must 162  
 be more appeared on the stem (Supplementary Fig. 6b).

## Discussion

In future studies, the prickle position on the other species of 163  
 roses should be measured, in order to confirm that the pat- 164  
 terning based on our model is conserved between the species. 165  
 The number of prickles on the stem has a large variation be- 166  
 tween species of roses. Those differences of prickle pattern- 167  
 ing could be reproduced by the changing parameters. Al- 168  
 though analysis of entire genomes of roses is few compared 169

with those in other species and because sequencing remains challenging(16, 17), comprehensive analysis of genome and the pattern will help to detect genes that cause the differences. In addition, time-dependent development of prickles should be observed in future studies. Small prickles whose height is lower than 1 cm were observed (Supplementary Fig. 7). Especially, they appeared frequently at the bottom side of the stem. A similar phenomenon has been reported on the stem of *Rosa hybrida* cv. 'Laura'(18), but the patterning of the small prickles is not understood. It is also not known whether the small prickle grows into the mature prickle. The observation may also reveal the  $\Phi$  distribution of the prickles is slightly changed depends on the height (Supplementary Fig. 8a). We found, when dividing the height from the root to the top leaf into the three layers, the unimodal distribution is shown at the top layer, but bimodal distribution is shown at the other layers (Supplementary Fig. 8b). Those facts may indicate the parameters of the prickle slightly changes as the rose grows.

It is generally accepted that spiny structures on the stem play a key role in defense against herbivore(19, 20). In addition, prickle is considered as attachment devices to prevent slipping off the axes from supporting structures. Previous studies have discussed the two roles by focusing on the shape, physicochemical and biological properties of the spiny structures on the stem(21–23), but herein we shed light on the possibility that the spatial pattern of the prickles makes the two roles more effective. Spiral patterns of leaves are based on the golden angle which avoids overlapping of growing leaves when viewed from the top of the stem, thus increasing the efficiency of photosynthesis. Prickles occurred frequently at the specific angular position relative to the spiral curves of leaf position. Therefore, the prickles also appear in the spiral pattern which avoids the overlapping like a leaf (Supplementary Fig. 2). The character of the pattern would perform more efficient at preventing slipping off and at defense from an herbivore.

Spiny structures on the stem of plants are derived from many types of tissue of plants. Although, the prickle on the stem of rose is derived from epidermal cells on the stem, it is known that the spiny structures on the other plants, such as *Robinia pseudoacacia* and *Zanthoxylum piperitum*, are derived from stipule. Interestingly, the position of prickles of *Z. piperitum* shows the pair pattern like Figure 3a, but *Z. schinifolium* loses the pair pattern(24). The pattern looks random and is not determined yet. It is not revealed that why the difference of spatial pattern of spiny structure derived from stipule happens. In the future study, our model of prickles may be used to explain the difference of spatial pattern of spiny structures derived from stipule.

Although humans have characterized roses in numerous reports since the start of cultivation several thousand years ago, this is the first report to show the spatial pattern of prickles with the statistical data and to suggest the mathematical model. Moreover, in this paper, we suggest the spatial pattern will affect the role of prickles. Further investigation will clarify the role of the patterning and reveal the entity of the

diffusing factors. Even though herein we suggest the simple model, further developing of our model will help to build a novel theory of plant development based on diffusion, especially the protrusion structures on the epidermis of the plant.

## Methods

**Plant materials and measurement.** *Rosa hybrida* cv. 'Red Queen' was purchased from Keisei Rose Nurseries (Chiba, Japan). The plants were cultivated in pots placed at the open field under natural daylight. The angle and position of prickles and leaves on the lateral axis were measured by protractor and calipers. The direction from the lateral axis to the main axis was set to 0°. Small prickles with a height of 1 cm or less were not measured. Clockwise and counter clockwise spiral pattern of leaf were not distinguished in this study. All data was analyzed by R program ver. 3.5.2.

**Model.** We assumed that the emergence of prickles can be inhibited by the diffusive molecules secreted from the primordia that radially move down from meristem. The primordia can be produced with a constant divergence angle  $\Phi$  at every time interval  $T$ . The priming zone where the prickles are emerged locates on the meristem. If the priming zone is not large, the zone can be simply represented as a circle. Let  $\phi$  be an angle on the circle of priming zone and set  $\phi = 0$  for the direction of  $n$ th primordia, without loss of generality. Suppose that the inhibitor can diffuse on only the surface on the meristem. Concentration of diffusive particles produced in a single point and randomly diffuse on a 2D plane obey the normal distribution at equilibrium state. Then, the particles on a circle with a distance  $m$  from the source are distributed as a von Mises distribution (25). Thus, the intensity of inhibitor at a angle of  $\phi$  on priming circle can be approximately proportional to von Mises distribution, i.e.,  $f_i(\phi, t) = k(t) \exp(m \cos(\phi - \phi_i))$ , where  $\phi_i$  is the direction of  $i$ th primodium and  $k$  is a time-dependent parameter. We here set  $t = 0$  at the time when  $n$ th primordia pass the priming zone and  $m(t) = \max[\alpha t + \beta, 0]$ . In addition, we assumed the secretion of inhibitor arises when the primordia is passing through vicinity of priming zone, thus depends on  $t$ . The magnitude of secretion,  $k(t)$ , was represented as a piecewise linear function:

$$k(t) = \begin{cases} \frac{t-T_a}{T_b-T_a}, & T_a < t < T_b \\ \frac{T_c-t}{T_c-T_b}, & T_b \leq t < T_c \\ 0, & \text{otherwise} \end{cases}$$

where  $T_a < T_b < T_c$ ,  $-T \leq T_a$ ,  $0 < T_c \leq 2T$ , implying only  $n-1$ ,  $n$  and  $n+1$ th primordia contribute to distribute the inhibitor on the priming circle. Taken together, the total intensity of inhibitor produced from every primodium at time  $t$ ,

277  $f(\phi)$  can be described as,

$$\begin{aligned} f(\phi, t) &= \sum_i f_i(\phi, t) \\ &= k(t-T) \exp\{m(t-T) \cos(\phi - \Phi)\} \\ &\quad + k(t) \exp\{m(t) \cos \phi\} \\ &\quad + k(t+T) \exp\{m(t+T) \cos(\phi + \Phi)\}. \end{aligned}$$

278 The parameters in this model,  $\alpha$ ,  $\beta$ ,  $T_a$ ,  $T_b$  and  $T_c$  were  
279 chosen to reproduce the experimental data through optimiza-  
280 tion algorithm. The real distribution based on the observa-  
281 tion,  $f_r(\phi, t)$  was obtained through kernel density estimation  
282 based on the observed arrangement of prickles. We sampled  
283 the values of  $f(\phi_i, t_j)$  and  $f_r(\phi_i, t_j)$  where  $\phi_i = 2\pi i/N_d$ ,  
284  $t_j = jT/N_d$  and division number  $N_d$  is 100. The cost func-  
285 tion was introduced as the Pearson correlation coefficient for  
286 the sampled values of  $f$  and  $f_r$ , multiplied by  $-1$ . Kernel  
287 density estimation was performed by the function `kde2d` in  
288 the R MASS Package ver 7.3-50. Optimization procedure  
289 was performed by the function `optim` with BFGS method in  
290 the R stats package ver 3.6.0.

- 341 23. Halpern, M., Raats, D. & Lev-Yadun, S. Plant biological warfare: Thorns inject  
342 pathogenic bacteria into herbivores. *Environmental Microbiology* **9**, 584–592, DOI: [10.1111/](https://doi.org/10.1111/j.1462-2920.2006.01174.x)  
343 [j.1462-2920.2006.01174.x](https://doi.org/10.1111/j.1462-2920.2006.01174.x) (2007).  
344 24. Ohwi, J. Flora of Japan (rev. ed.). *Shibundo Co. Ltd., Tokyo* (1965).  
345 25. Bishop, C. M. *Pattern Recognition and Machine Learning (Information Science and Statis-*  
346 *tics)* (Springer, 2007), 1 edn.

347 **Acknowledgements.** We thank to Prof. Hirokazu Tsukaya  
348 (Univ. of Tokyo) and Assoc Prof. Munetaka Sugiyama (Univ.  
349 of Tokyo) for valuable comments to our research, R. Yasui  
(Kyushu Univ.) for helping drawing an illustration of rose of  
Fig. 1b and Sergey Melnikov (Yale Univ.) for many valuable  
comments to our manuscripts. Fukuoka City Botanical Gar-  
den where the idea of this paper first came up for us. Rose  
garden in Jindai Botanical Garden and Chiba Kashiwanoha  
Park where the idea was sophisticated.

**Author contributions statement.** Cultivation study and  
measurement were performed by K.A. Analyzing data and  
writing manuscript was performed by K.A. and H.I.

## 291 References

- 292 1. Rashevsky, N. Physicomathematical aspects of some problems of organic form. *The Bul-*  
293 *letin of Mathematical Biophysics* **2**, 109–121, DOI: [10.1007/BF02478175](https://doi.org/10.1007/BF02478175) (1940).  
294 2. Lawrence, P. A. Morphogens: How big is the big picture?, DOI: [10.1038/35083096](https://doi.org/10.1038/35083096) (2001).  
295 3. Turing, A. M. The Chemical Basis of Morphogenesis. *Philosophical Transactions of the*  
296 *Royal Society B: Biological Sciences* **237**, 37–72, DOI: [10.1098/rstb.1952.0012](https://doi.org/10.1098/rstb.1952.0012) (1952).  
297 4. Kondo, S. & Miura, T. Reaction-diffusion model as a framework for understanding bio-  
298 logical pattern formation. *Science* **329**, 1616–1620, DOI: [10.1126/science.1179047](https://doi.org/10.1126/science.1179047) (2010).  
299 [NIHMS150003](https://doi.org/10.1126/science.1179047).  
300 5. Green, J. B. A. & Sharpe, J. Positional information and reaction-diffusion: two big ideas in  
301 developmental biology combine. *Development* **142**, 1203–1211, DOI: [10.1242/dev.114991](https://doi.org/10.1242/dev.114991)  
302 (2015).  
303 6. Vanneste, S. & Friml, J. Auxin: A Trigger for Change in Plant Development. *Cell* **136**,  
304 1005–1016, DOI: [10.1016/j.cell.2009.03.001](https://doi.org/10.1016/j.cell.2009.03.001) (2009). [arXiv:1408.1149](https://arxiv.org/abs/1408.1149).  
305 7. Reinhardt, D. *et al.* Regulation of phyllotaxis by polar auxin transport. *Nature* **426**, 255–260,  
306 DOI: [10.1038/nature02081](https://doi.org/10.1038/nature02081) (2003).  
307 8. Smith, R. S. *et al.* A plausible model of phyllotaxis. *Proceedings of the National Academy*  
308 *of Sciences* **103**, 1301–1306, DOI: [10.1073/pnas.0510457103](https://doi.org/10.1073/pnas.0510457103) (2006).  
309 9. Fujita, H. & Mochizuki, A. The origin of the diversity of leaf venation pattern. *Developmental*  
310 *Dynamics* **235**, 2710–2721, DOI: [10.1002/dvdy.20908](https://doi.org/10.1002/dvdy.20908) (2006).  
311 10. Torii, K. U. Two-dimensional spatial patterning in developmental systems, DOI: [10.1016/j.](https://doi.org/10.1016/j.tcb.2012.06.002)  
312 [tcb.2012.06.002](https://doi.org/10.1016/j.tcb.2012.06.002) (2012).  
313 11. Kellogg, A. A., Branaman, T. J., Jones, N. M., Little, C. Z. & Swanson, J.-D. Morphological  
314 studies of developing *Rubus* prickles suggest that they are modified glandular trichomes.  
315 *Botany* **89**, 217–226, DOI: [10.1139/b11-008](https://doi.org/10.1139/b11-008) (2011).  
316 12. Saint-Oyant, L. H. *et al.* A high-quality genome sequence of *Rosa chinensis* to elucidate  
317 ornamental traits. *Nature Plants* **4**, 473–484, DOI: [10.1038/s41477-018-0166-1](https://doi.org/10.1038/s41477-018-0166-1) (2018).  
318 13. Rajapakse, S. *et al.* Two genetic linkage maps of tetraploid roses. *Theoretical and Applied*  
319 *Genetics* **103**, 575–583, DOI: [10.1007/PL00002912](https://doi.org/10.1007/PL00002912) (2001).  
320 14. Gitonga, V. W. *et al.* Genetic variation, heritability and genotype by environment interaction  
321 of morphological traits in a tetraploid rose population. *BMC Genetics* **15**, 146, DOI: [10.1186/](https://doi.org/10.1186/s12863-014-0146-z)  
322 [s12863-014-0146-z](https://doi.org/10.1186/s12863-014-0146-z) (2014).  
323 15. Adrian D. B. & Alan, B. *Plant Form: An Illustrated Guide to Flowering Plant Morphology*  
324 *(New Edition)* (Timber Press, Inc/, 2008).  
325 16. Raymond, O. *et al.* The *Rosa* genome provides new insights into the domestication of  
326 modern roses. *Nature Genetics* **50**, 772–777, DOI: [10.1038/s41588-018-0110-3](https://doi.org/10.1038/s41588-018-0110-3) (2018).  
327 17. Nakamura, N. *et al.* Genome structure of *Rosa multiflora*, a wild ancestor of cultivated roses.  
328 *DNA Research* **25**, 113–121, DOI: [10.1093/dnares/dsx042](https://doi.org/10.1093/dnares/dsx042) (2018).  
329 18. Asano, G., Kubo, R. & Tanimoto, S. Growth, Structure and Lignin Localization in Rose  
330 Prickle. *Bulletin of the Faculty of Agriculture Saga University* **93**, 117–125 (2008).  
331 19. Milewski, A. V., Young, T. P. & Madden, D. Thorns as induced defenses: experimental  
332 evidence. *Oecologia* **86**, 70–75, DOI: [10.1007/BF00317391](https://doi.org/10.1007/BF00317391) (1991).  
333 20. Cooper, S. M. & Owen-Smith, N. Effects of plant spinescence on large mammalian herbi-  
334 vores. *Oecologia* **68**, 446–455, DOI: [10.1007/BF01036753](https://doi.org/10.1007/BF01036753) (1986).  
335 21. Burris, J. N., Lenaghan, S. C. & Stewart, C. N. Climbing plants: attachment adaptations and  
336 bioinspired innovations. *Plant Cell Reports* **37**, 565–574, DOI: [10.1007/s00299-017-2240-y](https://doi.org/10.1007/s00299-017-2240-y)  
337 (2018).  
338 22. Gallenmüller, F., Feus, A., Fiedler, K. & Speck, T. Rose prickles and Asparagus spines - Dif-  
339 ferent hook structures as attachment devices in climbing plants. *PLoS ONE* **10**, e0143850,  
340 DOI: [10.1371/journal.pone.0143850](https://doi.org/10.1371/journal.pone.0143850) (2015).

## Supplemental Information

# Discovery of the spatial pattern of prickles on the stem of the rose and the mathematical model of the pattern.

Kazuaki Amikura<sup>12\*</sup> and Hiroshi Ito<sup>3</sup>

<sup>1</sup>Department of Molecular Biophysics and Biochemistry, Yale University, New Haven, Connecticut, USA;

<sup>2</sup>Department of Computational Biology and Medical Sciences,  
Graduate School of Frontier Sciences, The University of Tokyo, Japan;

<sup>3</sup>Department of Art and Information Design, Faculty of Design, Kyushu University

\*Corresponding Author: [kazuaki.amikura@yale.edu](mailto:kazuaki.amikura@yale.edu)

**Supplementary Figure 1.** Differential values of leaf degrees. a, In order from the top of each stem, the number of leaf index was assigned.  $\Delta\theta$  is the difference of the  $\theta_c$  between the adjacent leaves. The  $\Phi$  is about  $137.5^\circ$  which is the golden angle. b, The histogram represents the  $\Delta\theta$  from all samples.

**a**

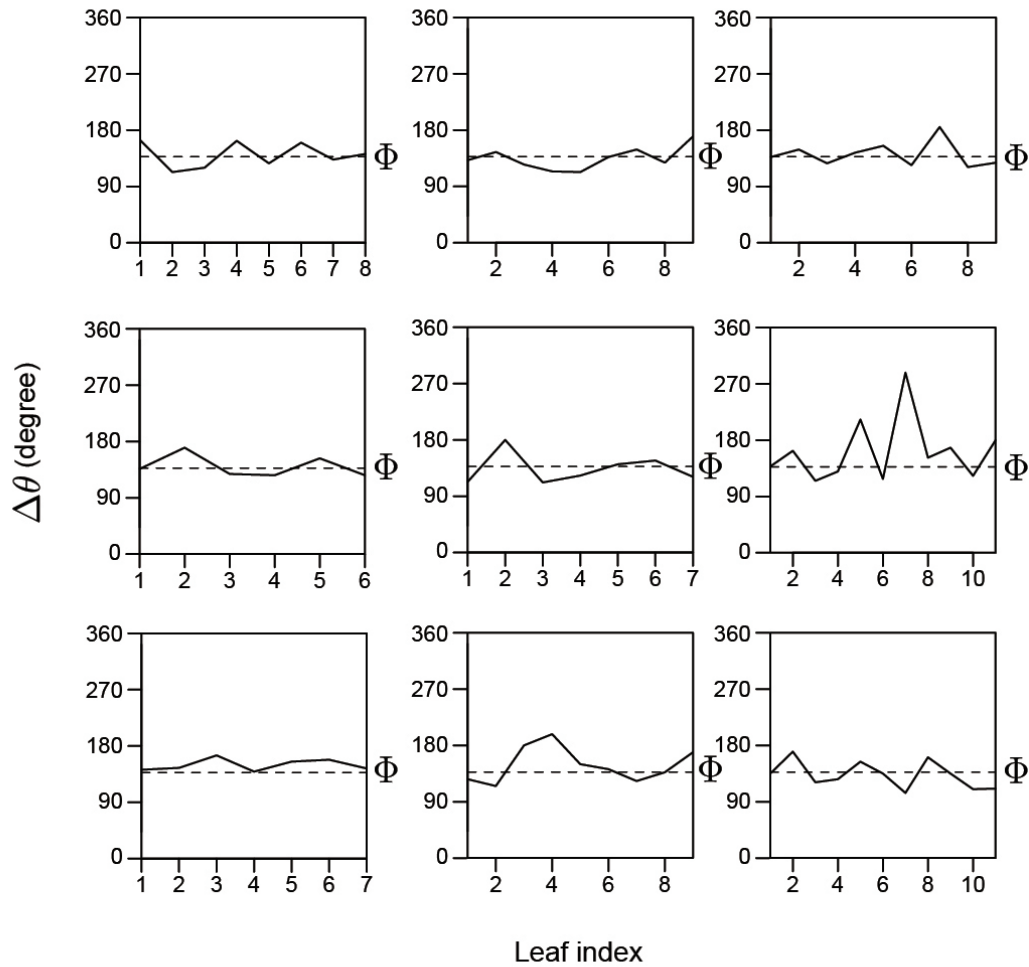

**b**

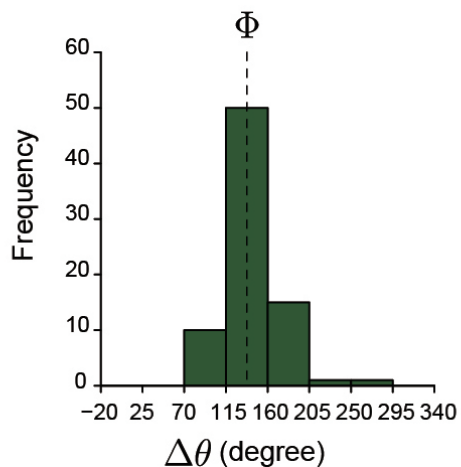

Supplementary Figure 2. The  $H$ - $\theta_c$  plane of all samples.

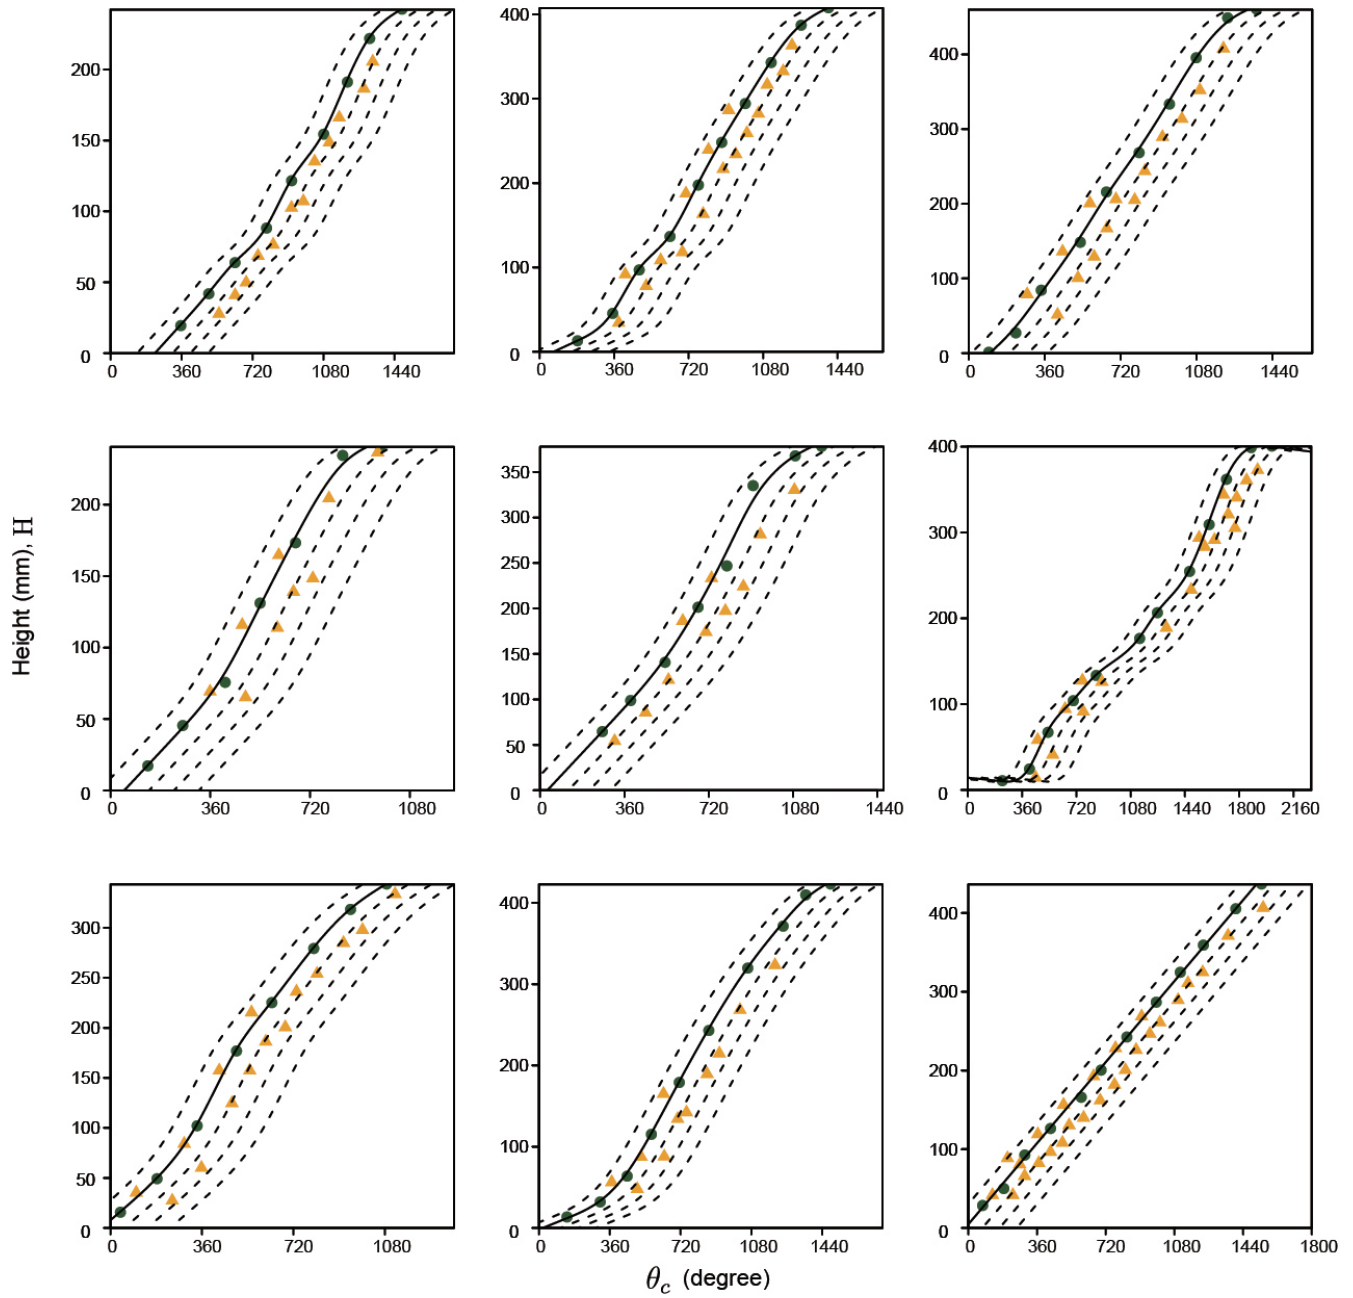



**Supplementary Figure 3.** Analysis variation of  $H$ - $\phi$  plane using optimized parameter. a Estimated distribution of prickles on the  $\phi$ - $h$  plane through kernel density estimation for real data (the same figure as Fig 2b). Two parameter sets were obtained by maximizing the Pearson's correlation between density from real data and  $I^{-1}$  calculated from a model. b, e distribution of  $I^{-1}$  obtained from the optimized model with each optimized parameter sets. c, f The trajectory of the primordia are drawn on the  $\phi$ - $h$  plane. The red and blue represents the interval where the amount of secretion of inhibitor are increasing  $\frac{dk}{dt} > 0$  and decreasing  $\frac{dk}{dt} < 0$ , respectively. d, g The correlation between the estimated density obtained from real data and  $I^{-1}$  obtained from the optimized model. The correlation coefficient  $\rho$  is displayed in each figure.

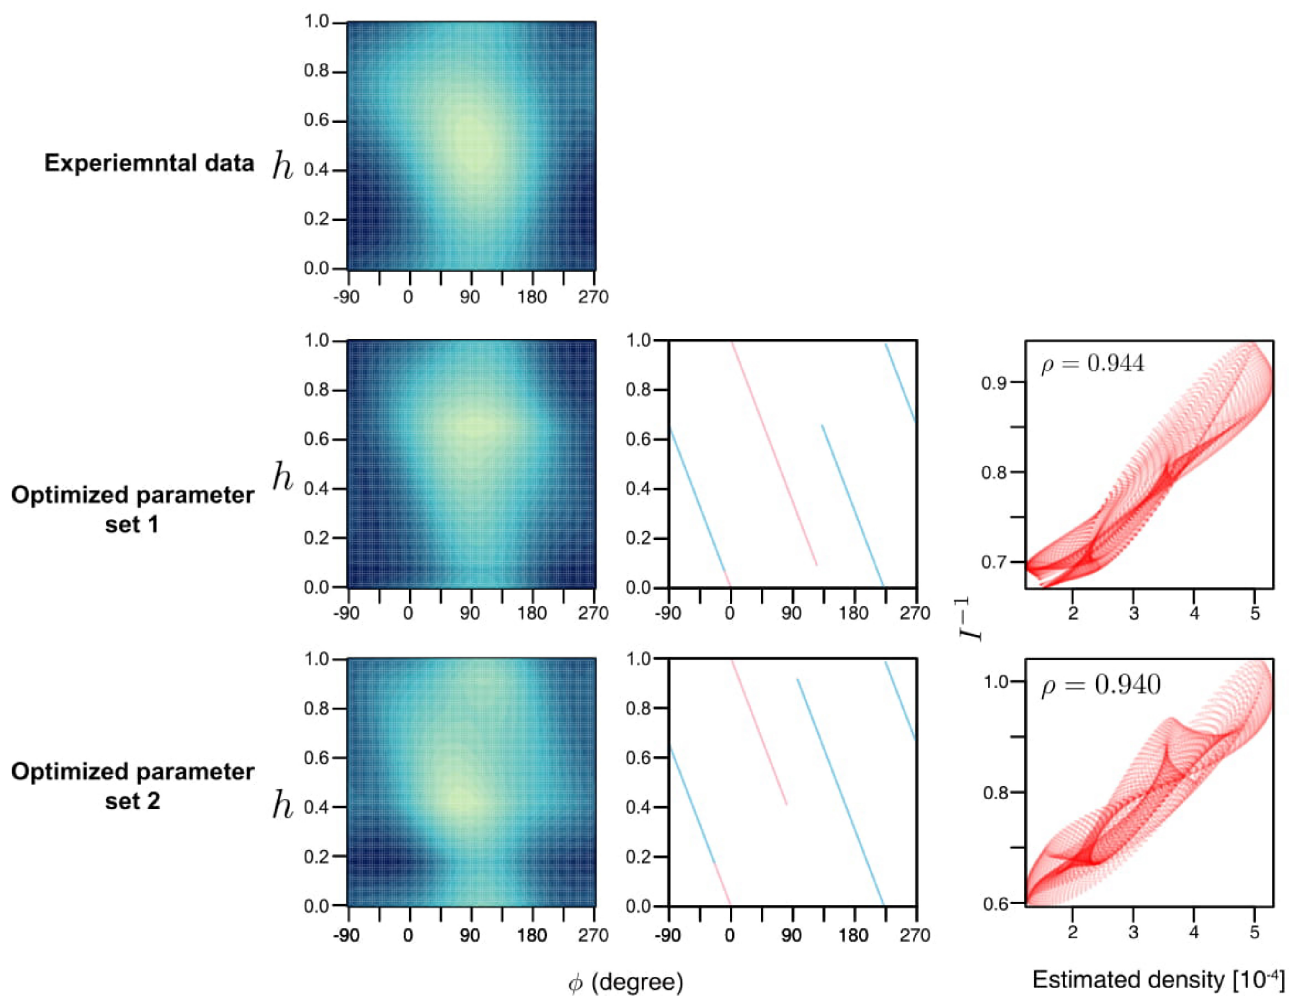

**Supplementary Figure 4.** Parameter sensitivity. a, The correlation between the real data and the simulation data. The  $T_a$ ,  $T_b$  and  $T_c$  is fixed at optimized parameters at Figure 2c.  $\alpha^*$  and  $\beta^*$  is 0.267 and 0.139. b, The  $f(\phi, t)$ - $\phi$  graph is drawn at each point.

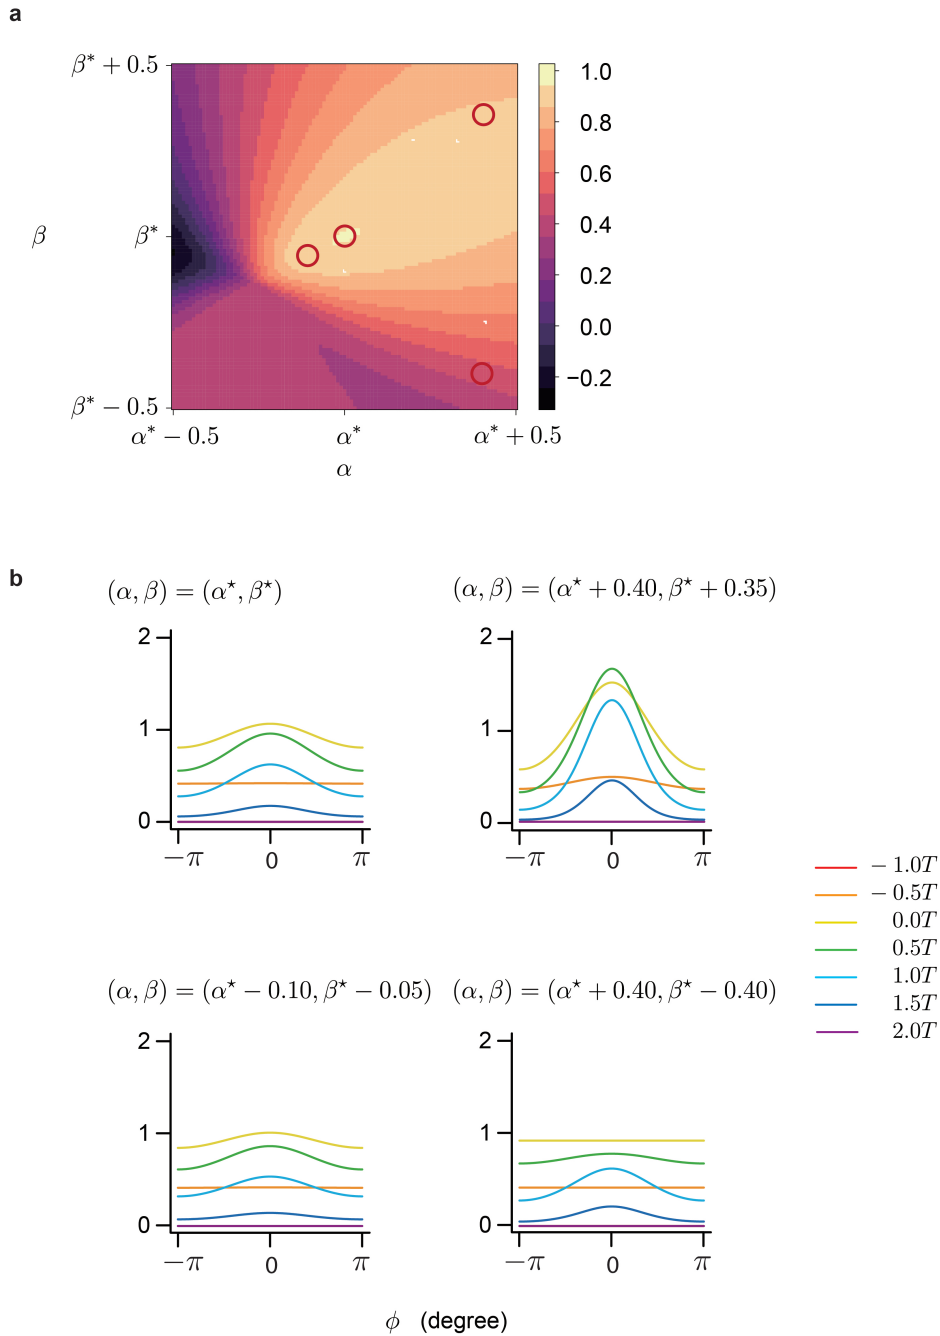

**Supplementary Figure 5.**  $f(\phi, t)$ - $\phi$  graph. a, The graph drawn by the set of parameters of Figure 2c. b, The graph drawn by the set of parameters of Figure 3c.

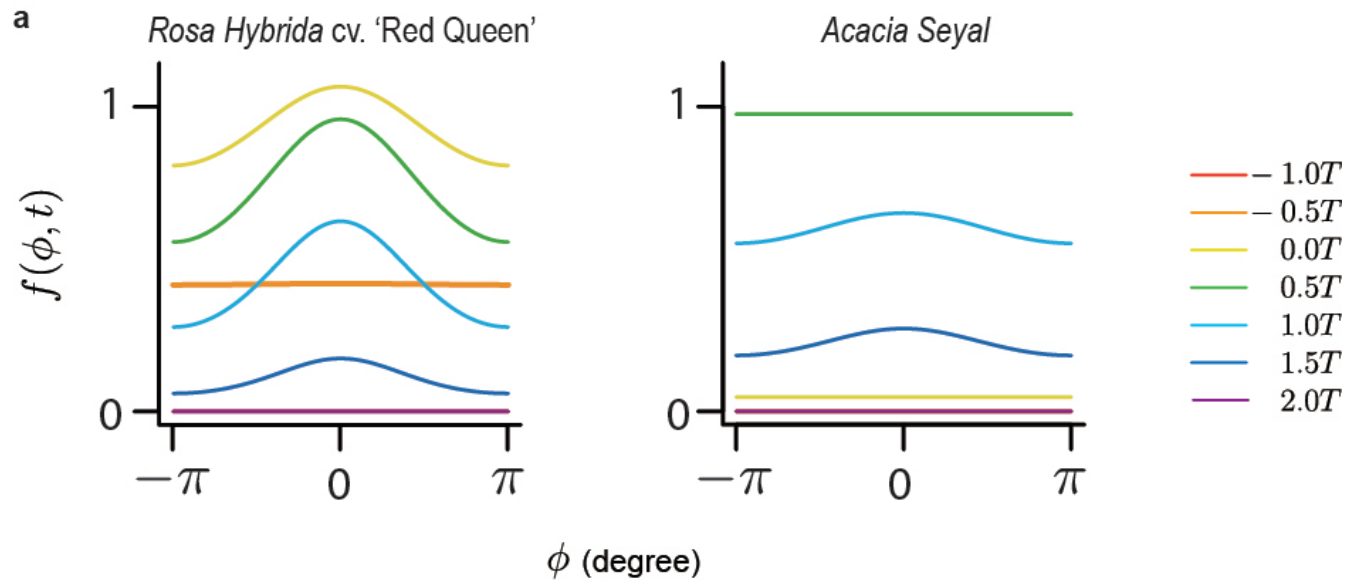

**Supplementary Figure 6.** Interactions between prickles. a, the distribution of  $d_{pp}$ . b, Fused prickle on the stem of *Rosa hybrida* cv. 'Carinella'.

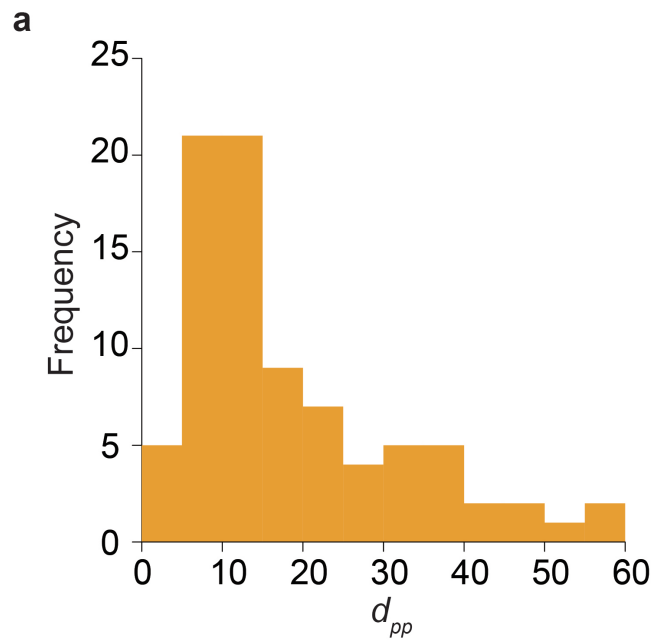

**b**

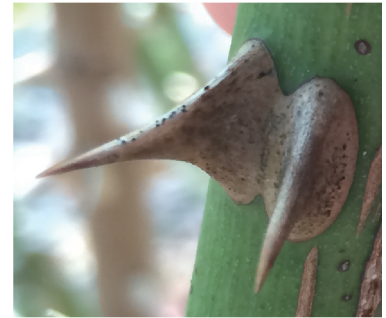

**Supplementary Figure 7.** Small prickles. a, Large and small prickle on the stem of *Rosa hybrida* cv. 'Red Queen'. The black arrow is pointing to the small prickle.

**a**

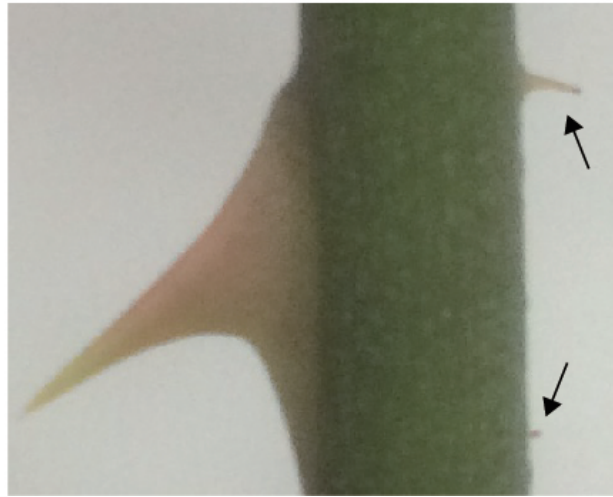

**Supplementary Figure 8.** Bimodality of the distribution of  $\phi$ . a, The divided area in height dependence. b, The histogram of  $h$  in the each area.

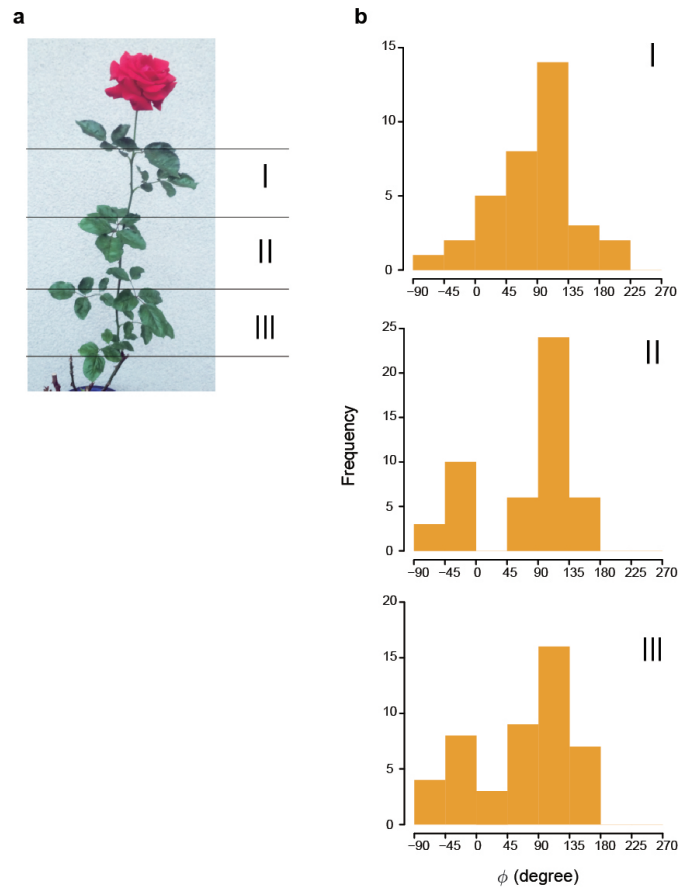

Source: https://www.biorxiv.org/content/10.1101/811281v2.full.pdf
